# Supplementary material
Source: publisher figshare collection journal article supplement (https://acs.figshare.com/ndownloader/files/4663255)
Supplement: Supplementary file 1 [file 4663255]

Supporting Information

# Inorganic/Organic Hybrid Silica Nanoparticles as a Nitric Oxide Delivery Scaffold

*Jae Ho Shin and Mark H. Schoenfisch\**

Contribution from the Department of Chemistry, the University of North Carolina at Chapel Hill,  
Chapel Hill, NC 27599

\* To whom correspondence should be addressed. E-mail: [schoenfisch@unc.edu](mailto:schoenfisch@unc.edu)

**Scheme S1.** Mechanism of *N*-diazoniumdiolate formation on the secondary amine nitrogen of a polyamine-based alkoxy silane precursor under basic (NaOMe) conditions (Adapted from Drago et al.<sup>a,b,c</sup>)

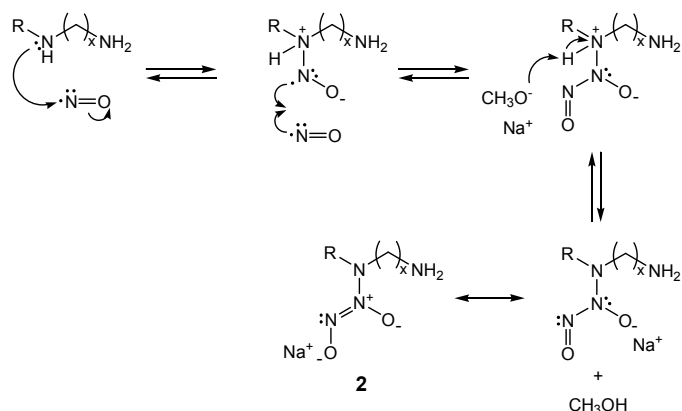

<sup>a</sup>Drago, R. S.; Karstetter, B. R. *J. Am. Chem. Soc.* **1961**, 83, 1819-1822; Ragsdale, R. O.; Karstetter, B. R.; Drago, R. S. *Inorg. Chem.* **1965**, 4, 420-422. <sup>b</sup>R is an alkyltrimethoxysilane group. <sup>c</sup>One equivalent secondary amine nitrogen (nucleophile) reacts with two equivalents of NO (Steps 1 and 2). The strong base, NaOMe promotes the deprotonation from the secondary nitrogen (Step 3), shifting the reaction equilibrium toward *N*-diazoniumdiolate formation. The anionic structure of the NO adduct is stabilized with a sodium counteranion.

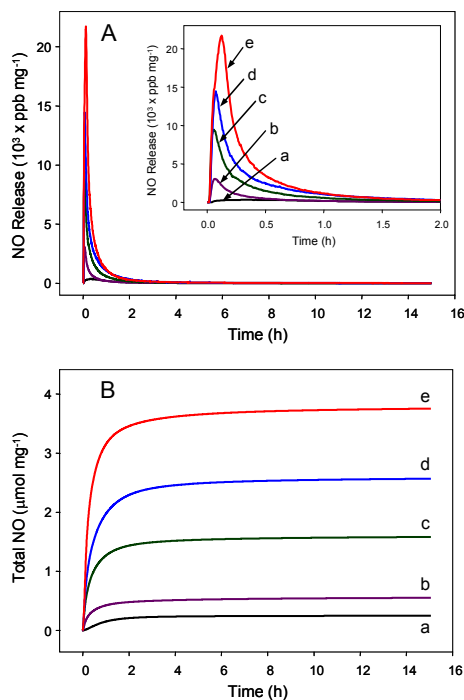

**Figure S2.** Real-time NO release profiles (A) and total NO release amount (B) for *N*-diazoniumdiolate-modified silica particles with different concentrations of AHAP3 precursors: (a) 10, (b) 10, (c) 25, (d) 35, and (e) 45 mol% (balance TEOS). While (a) was synthesized via a “post-formation” method, (b) – (e) were prepared via a “pre-formation” strategy. Inset plot (A') represents the expansion of graph (A) from 0 to 2 h.
